# Supplementary material for: Hyperpolarized 13C urea myocardial first-pass perfusion imaging using velocity-selective excitation
Source: PubMed Central journal article supplement (PMC5480203; doi:10.1186/s12968-017-0364-4), 2017-06-21

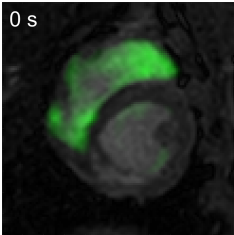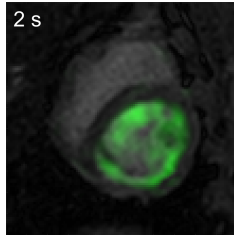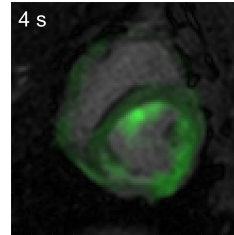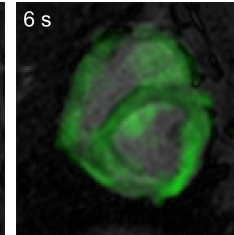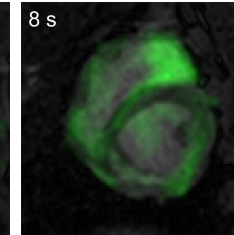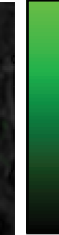

Supplement: 12968_2017_364_MOESM1_ESM.pdf [file 12968_2017_364_MOESM1_ESM.pdf]
